# Supplementary material for: Development and Validation of the Chronic Disease Population Risk Tool (CDPoRT) to Predict Incidence of Adult Chronic Disease
Source: PubMed Central journal article supplement (PMC7273197; doi:10.1001/jamanetworkopen.2020.4669), 2020-06-04
Supplement: jamanetwopen-3-e204669-s001.pdf [file jamanetwopen-3-e204669-s001.pdf]

## Supplementary Online Content

Ng R, Sutradhar R, Kornas K, et al. Development and validation of the Chronic Disease Population Risk Tool (CDPoRT) to predict incidence of adult chronic disease. *JAMA Network Open*. 2020;3(6):e204669. doi:10.1001/jamanetworkopen.2020.4669

### **eAppendix.** Calculating CDPoRT Probabilities

**eFigure 1.** Log Baseline Cumulative Hazard Function of the Royston-Parmar Model Using 6 Knots and All Predictors, by Sex

**eFigure 2.** Cohort Inclusion and Exclusion Criteria for the Ontario and Manitoba Cohort

**eFigure 3.** Calibration Curves at 10 Years for the Sensitivity Analysis of Women and Men in Ontario Who Did Not Self-report a History of Chronic Disease, by Model Version

**eFigure 4.** Calibration Curves at 10 Years for the Sensitivity Analysis of 9 Additional Chronic Disease Outcomes for Women and Men, by Model Version

**eTable 1.** Definitions for Measures of Predictive Performance

**eTable 2.** Starting and Final Predictor Specifications, by Sex

**eTable 3.** Fine-Gray Model of Time-to-First Chronic Disease With Death as a Competing Risk Using the Parsimonious Version of CDPoRT, by Sex

### **eReferences.**

This supplementary material has been provided by the authors to give readers additional information about their work.

## eAppendix. Calculating CDPoRT Probabilities

CDPoRT can calculate the probability of an individual being chronic disease-free ( $Pr_{CD-free}$ ) or the probability of having a chronic disease ( $Pr_{CD}$ ) using the Weibull PH coefficients listed in **Table 3** using the following formula:

$$\lambda = \exp(\beta_0 + \beta_i x_i)$$

$$Pr_{CD-free} = \exp(-\lambda t^\gamma)$$

$$Pr_{CD} = 1 - Pr_{CD-free}$$

where  $\lambda$  is the linear predictor as determined from the intercept ( $\beta_0$ ) and the self-reported characteristics of the individual ( $x_i$ ) multiplied by their respective coefficients ( $\beta_i$ ) from the Weibull PH model;  $t$  is the follow-up time at which the prediction is desired, in years; and  $\gamma$  is the shape parameter of the model. To determine the predicted number of incident chronic disease cases in the population, the predicted probabilities of chronic disease for each individual are summed together. This total can be divided by the total population size to get a predicted incidence.

Restricted cubic splines can be expressed as a difference of cubes. In this expression, a variable will have multiple terms. For example, age will have multiple values ( $z_j$ ) to multiply by each of the coefficients ( $S_j$ ) (**Table 2**) to determine its linear predictor ( $\lambda_{age}$ ). The table below can be used to calculate the age linear predictor. An example is also provided

$$\lambda_{age} = \exp(S_j z_j)$$

$$\lambda_{age\ 38,\ female} = \exp(S_1 z_1 + S_2 z_2 + S_3 z_3)$$

$$\lambda_{age\ 38,\ female} = \exp(0.13(-7) + (-0.26)(1.1574) + 0.51(0.0003))$$

$$\lambda_{age\ 38,\ female} = -1.21$$

| Age | Female term 1 value ( $z_1$ ) | Female term 2 value ( $z_2$ ) | Female term 3 value ( $z_3$ ) | Male term 1 value ( $z_1$ ) | Male term 2 value ( $z_2$ ) | Male term 3 value ( $z_3$ ) | Male term 4 value ( $z_4$ ) |
|-----|-------------------------------|-------------------------------|-------------------------------|-----------------------------|-----------------------------|-----------------------------|-----------------------------|
| 20  | -25                           | 0                             | 0                             | -25                         | 0                           | 0                           | 0                           |
| 21  | -24                           | 0                             | 0                             | -24                         | 0                           | 0                           | 0                           |
| 22  | -23                           | 0                             | 0                             | -23                         | 0                           | 0                           | 0                           |
| 23  | -22                           | 0                             | 0                             | -22                         | 0                           | 0                           | 0                           |
| 24  | -21                           | 0.0003                        | 0                             | -21                         | 0.003                       | 0                           | 0                           |
| 25  | -20                           | 0.0027                        | 0                             | -20                         | 0.011                       | 0                           | 0                           |
| 26  | -19                           | 0.0093                        | 0                             | -19                         | 0.027                       | 0                           | 0                           |
| 27  | -18                           | 0.0219                        | 0                             | -18                         | 0.052                       | 0                           | 0                           |
| 28  | -17                           | 0.0429                        | 0                             | -17                         | 0.09                        | 0                           | 0                           |
| 29  | -16                           | 0.0741                        | 0                             | -16                         | 0.143                       | 0                           | 0                           |
| 30  | -15                           | 0.1176                        | 0                             | -15                         | 0.213                       | 0                           | 0                           |
| 31  | -14                           | 0.1756                        | 0                             | -14                         | 0.304                       | 0                           | 0                           |
| 32  | -13                           | 0.25                          | 0                             | -13                         | 0.416                       | 0                           | 0                           |
| 33  | -12                           | 0.3429                        | 0                             | -12                         | 0.554                       | 0                           | 0                           |
| 34  | -11                           | 0.4564                        | 0                             | -11                         | 0.72                        | 0                           | 0                           |
| 35  | -10                           | 0.5926                        | 0                             | -10                         | 0.915                       | 0.0004                      | 0                           |
| 36  | -9                            | 0.7534                        | 0                             | -9                          | 1.143                       | 0.0033                      | 0                           |
| 37  | -8                            | 0.941                         | 0                             | -8                          | 1.406                       | 0.0112                      | 0                           |
| 38  | -7                            | 1.1574                        | 0.0003                        | -7                          | 1.706                       | 0.0267                      | 0                           |
| 39  | -6                            | 1.4047                        | 0.0027                        | -6                          | 2.046                       | 0.0521                      | 0                           |

| Age | Female term 1 value (z <sub>1</sub> ) | Female term 2 value (z <sub>2</sub> ) | Female term 3 value (z <sub>3</sub> ) | Male term 1 value (z <sub>1</sub> ) | Male term 2 value (z <sub>2</sub> ) | Male term 3 value (z <sub>3</sub> ) | Male term 4 value (z <sub>4</sub> ) |
|-----|---------------------------------------|---------------------------------------|---------------------------------------|-------------------------------------|-------------------------------------|-------------------------------------|-------------------------------------|
| 40  | -5                                    | 1.6848                                | 0.0093                                | -5                                  | 2.429                               | 0.09                                | 0                                   |
| 41  | -4                                    | 2                                     | 0.0219                                | -4                                  | 2.857                               | 0.1429                              | 0                                   |
| 42  | -3                                    | 2.3522                                | 0.0429                                | -3                                  | 3.332                               | 0.2132                              | 0                                   |
| 43  | -2                                    | 2.7435                                | 0.0741                                | -2                                  | 3.857                               | 0.3036                              | 0                                   |
| 44  | -1                                    | 3.1759                                | 0.1176                                | -1                                  | 4.435                               | 0.4165                              | 0.0004                              |
| 45  | 0                                     | 3.6516                                | 0.1756                                | 0                                   | 5.067                               | 0.5544                              | 0.0033                              |
| 46  | 1                                     | 4.1725                                | 0.25                                  | 1                                   | 5.758                               | 0.7197                              | 0.0112                              |
| 47  | 2                                     | 4.7407                                | 0.3429                                | 2                                   | 6.508                               | 0.915                               | 0.0267                              |
| 48  | 3                                     | 5.3584                                | 0.4564                                | 3                                   | 7.32                                | 1.1429                              | 0.0521                              |
| 49  | 4                                     | 6.0274                                | 0.5926                                | 4                                   | 8.198                               | 1.4057                              | 0.09                                |
| 50  | 5                                     | 6.75                                  | 0.7534                                | 5                                   | 9.143                               | 1.706                               | 0.1429                              |
| 51  | 6                                     | 7.5281                                | 0.941                                 | 6                                   | 10.158                              | 2.0462                              | 0.2132                              |
| 52  | 7                                     | 8.3639                                | 1.1574                                | 7                                   | 11.245                              | 2.429                               | 0.3036                              |
| 53  | 8                                     | 9.2593                                | 1.4047                                | 8                                   | 12.408                              | 2.8567                              | 0.4165                              |
| 54  | 9                                     | 10.2156                               | 1.6843                                | 9                                   | 13.648                              | 3.3319                              | 0.5544                              |
| 55  | 10                                    | 11.2311                               | 1.9954                                | 10                                  | 14.966                              | 3.8562                              | 0.719                               |
| 56  | 11                                    | 12.3032                               | 2.3368                                | 11                                  | 16.36                               | 4.4276                              | 0.9095                              |
| 57  | 12                                    | 13.4294                               | 2.7069                                | 12                                  | 17.825                              | 5.043                               | 1.1243                              |
| 58  | 13                                    | 14.6069                               | 3.1045                                | 13                                  | 19.355                              | 5.6996                              | 1.3618                              |
| 59  | 14                                    | 15.8333                               | 3.5281                                | 14                                  | 20.947                              | 6.3944                              | 1.6202                              |
| 60  | 15                                    | 17.1061                               | 3.9765                                | 15                                  | 22.595                              | 7.1245                              | 1.8981                              |
| 61  | 16                                    | 18.4225                               | 4.4481                                | 16                                  | 24.294                              | 7.8869                              | 2.1937                              |
| 62  | 17                                    | 19.7801                               | 4.9417                                | 17                                  | 26.041                              | 8.6787                              | 2.5055                              |
| 63  | 18                                    | 21.1763                               | 5.4559                                | 18                                  | 27.83                               | 9.497                               | 2.8319                              |
| 64  | 19                                    | 22.6085                               | 5.9893                                | 19                                  | 29.657                              | 10.3388                             | 3.1712                              |
| 65  | 20                                    | 24.0741                               | 6.5405                                | 20                                  | 31.516                              | 11.2012                             | 3.5218                              |
| 66  | 21                                    | 25.5706                               | 7.1081                                | 21                                  | 33.404                              | 12.0812                             | 3.8821                              |
| 67  | 22                                    | 27.0953                               | 7.6909                                | 22                                  | 35.315                              | 12.976                              | 4.2505                              |
| 68  | 23                                    | 28.6458                               | 8.2874                                | 23                                  | 37.246                              | 13.8825                             | 4.6254                              |
| 69  | 24                                    | 30.2195                               | 8.8962                                | 24                                  | 39.19                               | 14.7978                             | 5.0051                              |
| 70  | 25                                    | 31.8137                               | 9.516                                 | 25                                  | 41.144                              | 15.7189                             | 5.388                               |
| 71  | 26                                    | 33.4259                               | 10.1454                               | 26                                  | 43.102                              | 16.6431                             | 5.7726                              |
| 72  | 27                                    | 35.0536                               | 10.783                                | 27                                  | 45.061                              | 17.5677                             | 6.1574                              |
| 73  | 28                                    | 36.6941                               | 11.4275                               | 28                                  | 47.02                               | 18.4923                             | 6.5423                              |
| 74  | 29                                    | 38.3449                               | 12.0775                               | 29                                  | 48.98                               | 19.4169                             | 6.9271                              |
| 75  | 30                                    | 40.0034                               | 12.7316                               | 30                                  | 50.939                              | 20.3415                             | 7.312                               |
| 76  | 31                                    | 41.6671                               | 13.3884                               | 31                                  | 52.898                              | 21.2661                             | 7.6968                              |
| 77  | 32                                    | 43.3333                               | 14.0466                               | 32                                  | 54.857                              | 22.1908                             | 8.0816                              |
| 78  | 33                                    | 45                                    | 14.7051                               | 33                                  | 56.816                              | 23.1154                             | 8.4665                              |
| 79  | 34                                    | 46.6667                               | 15.3635                               | 34                                  | 58.776                              | 24.04                               | 8.8513                              |
| 80  | 35                                    | 48.3333                               | 16.0219                               | 35                                  | 60.735                              | 24.9646                             | 9.2362                              |
| 81  | 36                                    | 50                                    | 16.6804                               | 36                                  | 62.694                              | 25.8892                             | 9.621                               |
| 82  | 37                                    | 51.6667                               | 17.3388                               | 37                                  | 64.653                              | 26.8138                             | 10.0058                             |
| 83  | 38                                    | 53.3333                               | 17.9973                               | 38                                  | 66.612                              | 27.7384                             | 10.3907                             |
| 84  | 39                                    | 55                                    | 18.6557                               | 39                                  | 68.571                              | 28.6631                             | 10.7755                             |
| 85  | 40                                    | 56.6667                               | 19.3141                               | 40                                  | 70.531                              | 29.5877                             | 11.1603                             |

| Age | Female term 1 value (z <sub>1</sub> ) | Female term 2 value (z <sub>2</sub> ) | Female term 3 value (z <sub>3</sub> ) | Male term 1 value (z <sub>1</sub> ) | Male term 2 value (z <sub>2</sub> ) | Male term 3 value (z <sub>3</sub> ) | Male term 4 value (z <sub>4</sub> ) |
|-----|---------------------------------------|---------------------------------------|---------------------------------------|-------------------------------------|-------------------------------------|-------------------------------------|-------------------------------------|
| 86  | 41                                    | 58.3333                               | 19.9726                               | 41                                  | 72.49                               | 30.5123                             | 11.5452                             |
| 87  | 42                                    | 60                                    | 20.631                                | 42                                  | 74.449                              | 31.4369                             | 11.93                               |
| 88  | 43                                    | 61.6667                               | 21.2894                               | 43                                  | 76.408                              | 32.3615                             | 12.3149                             |
| 89  | 44                                    | 63.3333                               | 21.9479                               | 44                                  | 78.367                              | 33.2861                             | 12.6997                             |
| 90  | 45                                    | 65                                    | 22.6063                               | 45                                  | 80.327                              | 34.2107                             | 13.0845                             |
| 91  | 46                                    | 66.6667                               | 23.2647                               | 46                                  | 82.286                              | 35.1354                             | 13.4694                             |
| 92  | 47                                    | 68.3333                               | 23.9232                               | 47                                  | 84.245                              | 36.06                               | 13.8542                             |
| 93  | 48                                    | 70                                    | 24.5816                               | 48                                  | 86.204                              | 36.9846                             | 14.2391                             |
| 94  | 49                                    | 71.6667                               | 25.2401                               | 49                                  | 88.163                              | 37.9092                             | 14.6239                             |
| 95  | 50                                    | 73.3333                               | 25.8985                               | 50                                  | 90.122                              | 38.8338                             | 15.0087                             |
| 96  | 51                                    | 75                                    | 26.5569                               | 51                                  | 92.082                              | 39.7584                             | 15.3936                             |
| 97  | 52                                    | 76.6667                               | 27.2154                               | 52                                  | 94.041                              | 40.683                              | 15.7784                             |
| 98  | 53                                    | 78.3333                               | 27.8738                               | 53                                  | 96                                  | 41.6077                             | 16.1633                             |
| 99  | 54                                    | 80                                    | 28.5322                               | 54                                  | 97.959                              | 42.5323                             | 16.5481                             |
| 100 | 55                                    | 81.6667                               | 29.1907                               | 55                                  | 99.918                              | 43.4569                             | 16.9329                             |
| 101 | 56                                    | 83.3333                               | 29.8491                               | 56                                  | 101.878                             | 44.3815                             | 17.3178                             |
| 102 | 57                                    | 85                                    | 30.5075                               | 57                                  | 103.837                             | 45.3061                             | 17.7026                             |
| 103 | 58                                    | 86.6667                               | 31.166                                | 58                                  | 105.796                             | 46.2307                             | 18.0875                             |
| 104 | 59                                    | 88.3333                               | 31.8244                               | 59                                  | 107.755                             | 47.1554                             | 18.4723                             |
| 105 | 60                                    | 90                                    | 32.4829                               | 60                                  | 109.714                             | 48.08                               | 18.8571                             |
| 106 | 61                                    | 91.6667                               | 33.1413                               | 61                                  | 111.673                             | 49.0046                             | 19.242                              |
| 107 | 62                                    | 93.3333                               | 33.7997                               | 62                                  | 113.633                             | 49.9292                             | 19.6268                             |
| 108 | 63                                    | 95                                    | 34.4582                               | 63                                  | 115.592                             | 50.8538                             | 20.0117                             |
| 109 | 64                                    | 96.6667                               | 35.1166                               | 64                                  | 117.551                             | 51.7784                             | 20.3965                             |
| 110 | 65                                    | 98.3333                               | 35.775                                | 65                                  | 119.51                              | 52.703                              | 20.7813                             |

**eFigure 1. Log Baseline Cumulative Hazard Function of the Royston-Parmar Model Using 6 Knots and All Predictors, by Sex**

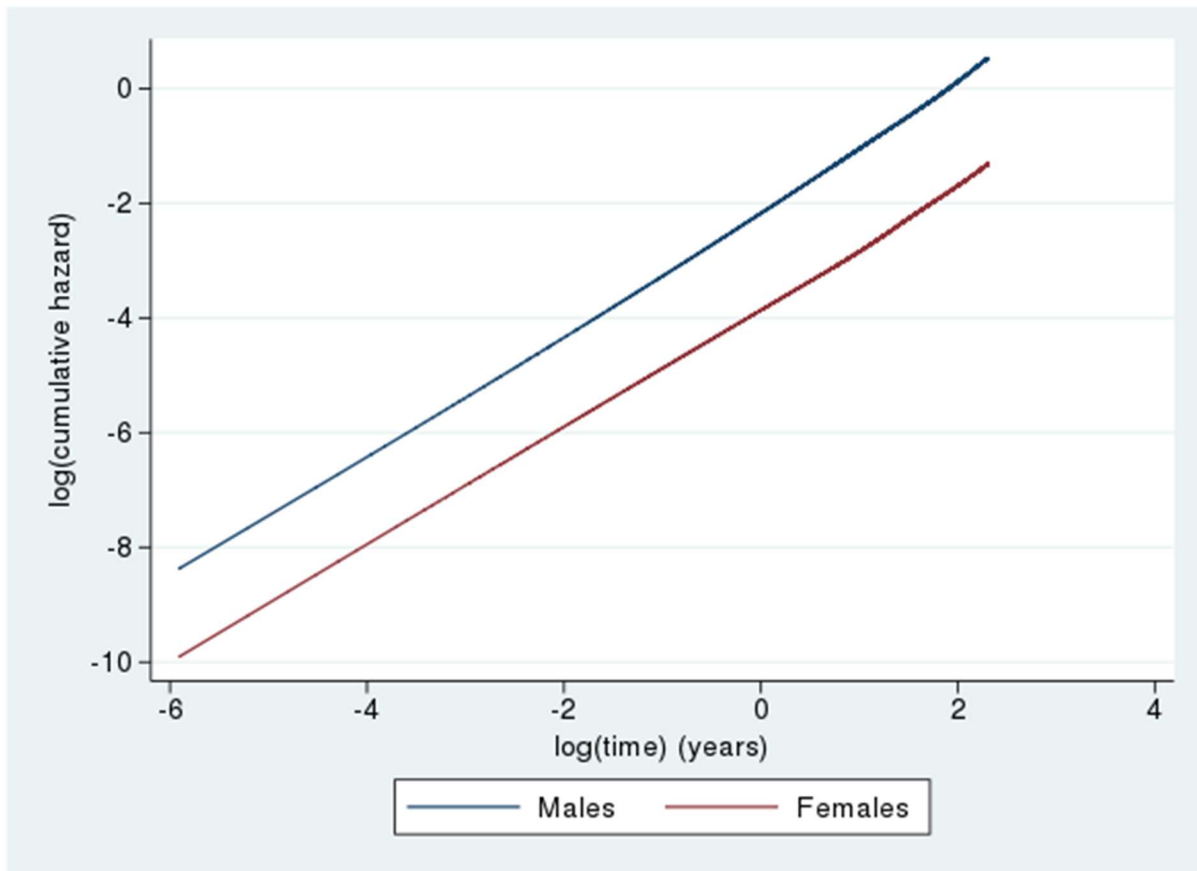

**eFigure 2. Cohort Inclusion and Exclusion Criteria for the Ontario (Left) and Manitoba (Right) Cohort**

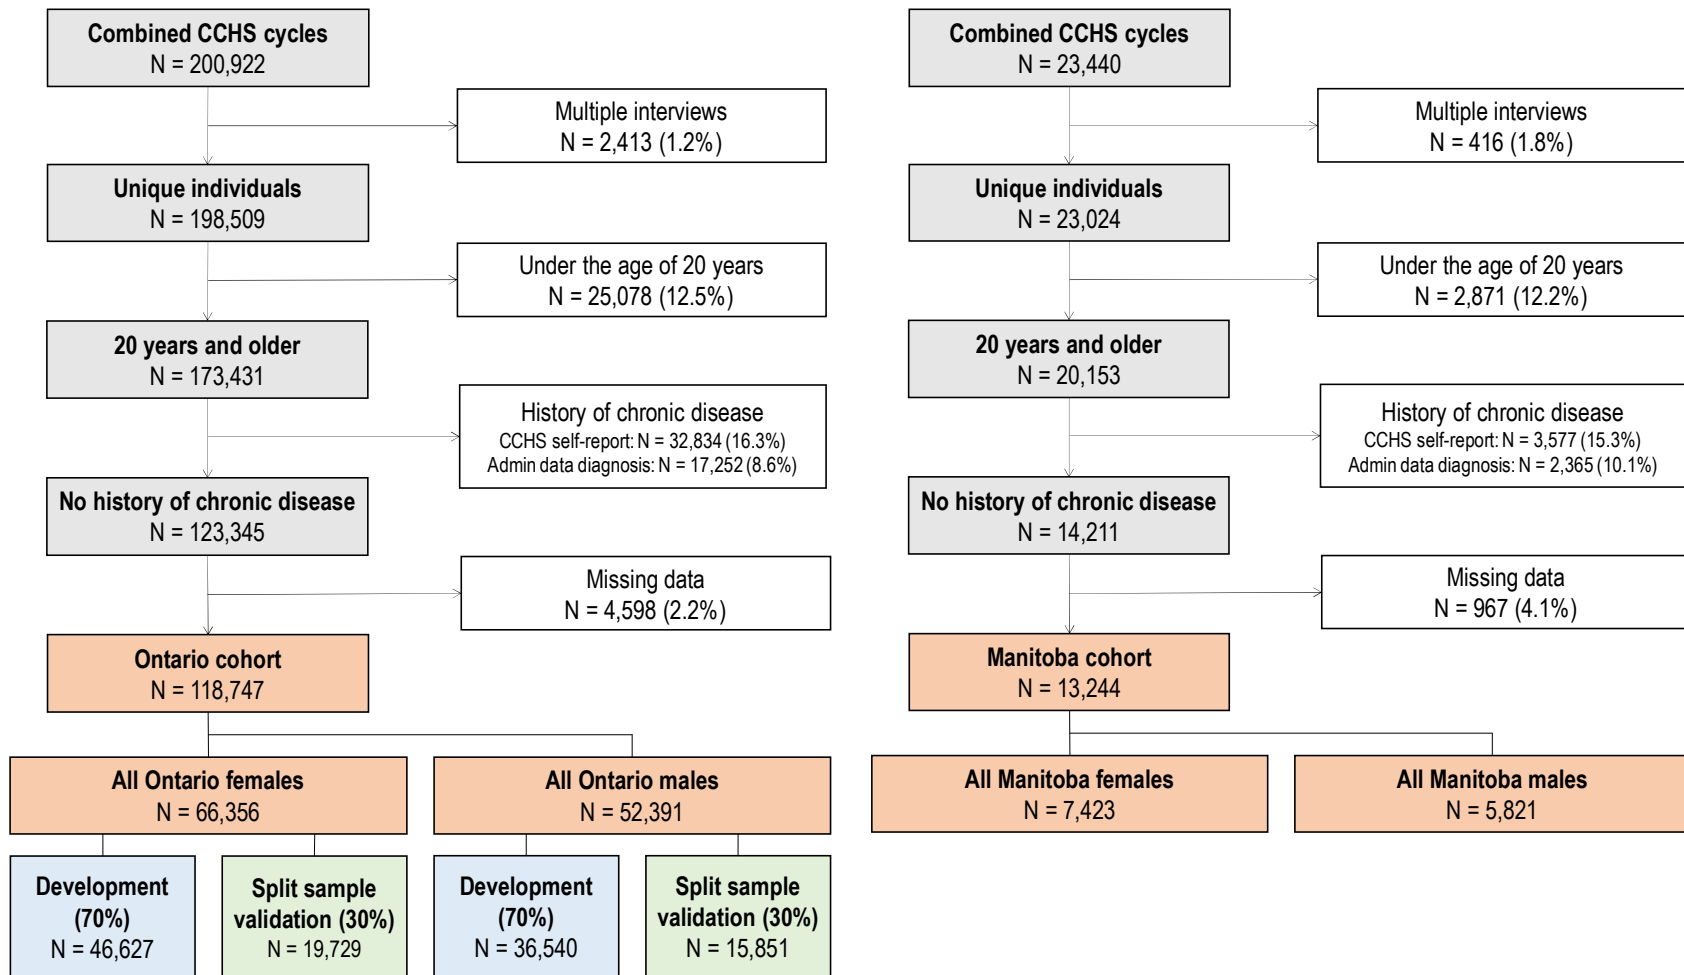

**eFigure 3. Calibration Curves at 10 Years for the Sensitivity Analysis of Women (Left) and Men (Right) in Ontario Who Did Not Self-report a History of Chronic Disease, by Model Version**

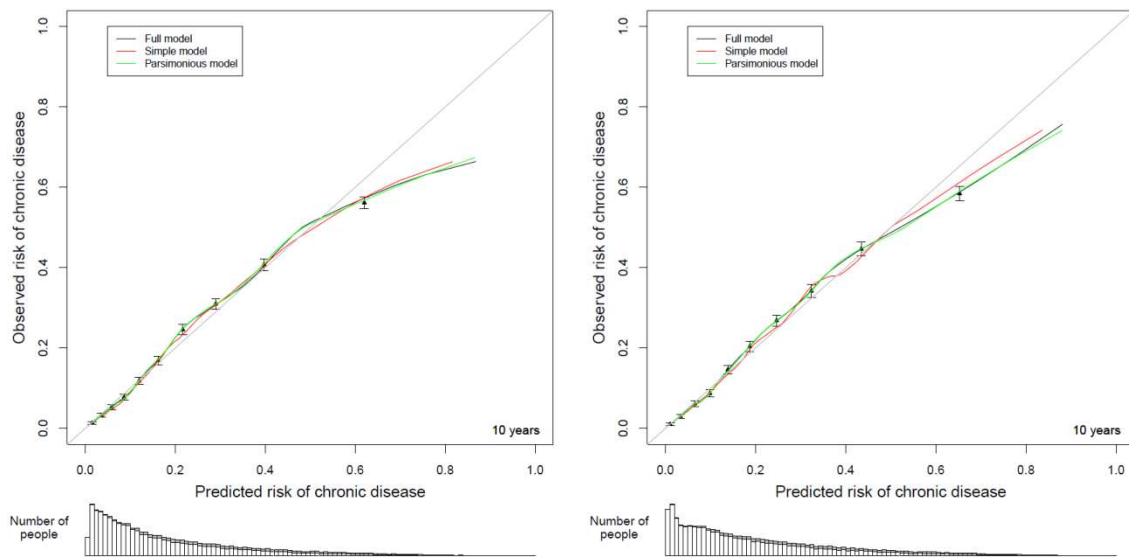

**eFigure 4. Calibration Curves at 10 Years for the Sensitivity Analysis of 9 Additional Chronic Disease Outcomes for Women (Left) and Men (Right), by Model Version**

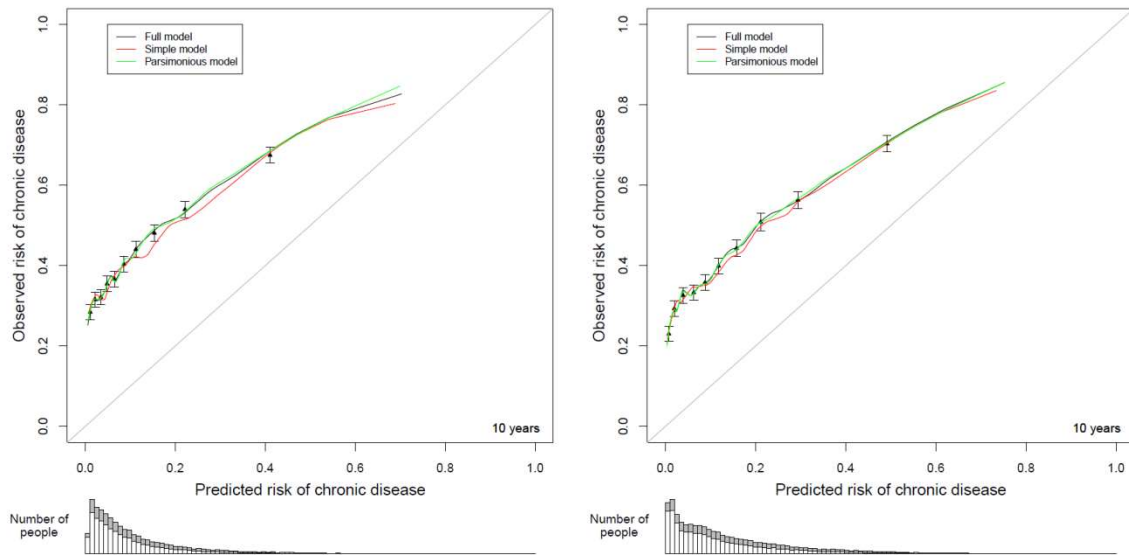

The error bars indicate 95% confidence intervals.



**eTable 1. Definitions for Measures of Predictive Performance**

| Measures of predictive performance           | Description                                                                                                                                                                                                                                      |
|----------------------------------------------|--------------------------------------------------------------------------------------------------------------------------------------------------------------------------------------------------------------------------------------------------|
| Overall measures                             | The amount of variability accounted for by the model.                                                                                                                                                                                            |
| <i>Nagelkerke's R<sup>2</sup></i>            | Coefficient of determination that indicates the amount of variance explained by the predictors <sup>1</sup> .                                                                                                                                    |
| <i>Brier score</i>                           | Mean-squared prediction error <sup>2,3</sup> .                                                                                                                                                                                                   |
| Discrimination                               | The ability to distinguish between those with and without the event <sup>4</sup> .                                                                                                                                                               |
| <i>Harrell's concordance index (c-index)</i> | The probability that from a randomly selected pairs of individuals, the individual with the shorter survival time has the higher predicted risk <sup>5</sup> .                                                                                   |
| <i>Discrimination slope</i>                  | Mean difference in the predicted probabilities between those with the event and those without the event at a particular time point <sup>4,6</sup> .                                                                                              |
| Calibration                                  | The agreement between predicted probabilities and observed outcomes <sup>7</sup> . Calibration is measured at a specific time point.                                                                                                             |
| <i>Calibration curve</i>                     | The calibration curve indicates the overall calibration of the model across all predicted probabilities visually <sup>8</sup> . The calibration curve also has a bar graph below that indicates the frequency of observations by predicted risk. |
| <i>Calibration intercept</i>                 | The difference in the mean observed risk and the mean predicted risk <sup>9</sup> .                                                                                                                                                              |
| <i>Calibration slope</i>                     | A measure of the overall calibration of the model across all predicted probabilities <sup>9</sup> .                                                                                                                                              |

Time-specific measure are measures that capture all cases up to time *t* (i.e. cumulative cases) and non-cases that have not yet had the outcome but are still at-risk (i.e. dynamic controls)<sup>10</sup>.

**eTable 2. Starting and Final Predictor Specifications, by Sex**

| Predictor                                | Starting specification                                                                                                      | Final specification (female full version)                                                                                                                        | Final specification (male full version)                                                                                                                          |
|------------------------------------------|-----------------------------------------------------------------------------------------------------------------------------|------------------------------------------------------------------------------------------------------------------------------------------------------------------|------------------------------------------------------------------------------------------------------------------------------------------------------------------|
| <b>Modifiable lifestyle risk factors</b> |                                                                                                                             |                                                                                                                                                                  |                                                                                                                                                                  |
| Alcohol consumption                      | Non-drinker<br>Light drinker<br>Moderate drinker<br>Heavy drinker                                                           | Unchanged                                                                                                                                                        | Unchanged                                                                                                                                                        |
| Cigarette smoking                        | Never smoked<br>Light smoker<br>Heavy smoker<br>Former light smoker<br>Former heavy smoker<br>Former smoker, unknown amount | Never smoked<br>Always an occasional smoker<br>Current occasional smoker, former daily smoker<br>Daily smoker<br>Former occasional smoker<br>Former daily smoker | Never smoked<br>Always an occasional smoker<br>Current occasional smoker, former daily smoker<br>Daily smoker<br>Former occasional smoker<br>Former daily smoker |
| Daily fruit and vegetable consumption    | 0 to 3 times<br>3 to 6 times<br>6 or more times                                                                             | Unchanged                                                                                                                                                        | Unchanged                                                                                                                                                        |
| Physical activity quartile               | Quartile 1 (lowest)<br>2<br>3<br>Quartile 4 (highest)                                                                       | Excluded                                                                                                                                                         | Excluded                                                                                                                                                         |
| <b>Sociodemographic factors</b>          |                                                                                                                             |                                                                                                                                                                  |                                                                                                                                                                  |
| Age                                      | 20 to 34 years<br>35 to 44 years<br>45 to 54 years<br>55 to 64 years<br>65 to 74 years<br>75 to 84 years<br>85+ years       | Restricted cubic spline centered at age 45 years with 4 knots (at 23, 37, 53 and 77 years)                                                                       | Restricted cubic spline centered at age 45 years with 5 knots (at 22, 34, 43, 54 and 71 years)                                                                   |
| Ethnicity                                | White / visible minority                                                                                                    | Unchanged                                                                                                                                                        | Unchanged                                                                                                                                                        |
| Immigration status                       | Canadian-born<br>Non-recent immigrant (10+ years)<br>Recent immigrant (<10 years)                                           | Excluded                                                                                                                                                         | Excluded                                                                                                                                                         |
| Income quintile                          | Quintile 1 (lowest)<br>2<br>3<br>4<br>Quintile 5 (highest)<br>Unknown income                                                | Excluded                                                                                                                                                         | Low income (Q 1)<br>Not low income (Q2 to Q5)<br>Unknown income                                                                                                  |
| Education                                | Less than secondary school graduation<br>Secondary school graduation<br>Post-secondary education (including partial)        | No post-secondary education<br>Post-secondary education (including partial)                                                                                      | Excluded                                                                                                                                                         |
| Marital status                           | Single, never married<br>Domestic partner (married or common-law)<br>Widowed, separated or divorced                         | Unchanged                                                                                                                                                        | Excluded                                                                                                                                                         |
| <b>Other health-related factors</b>      |                                                                                                                             |                                                                                                                                                                  |                                                                                                                                                                  |

| Predictor                                | Starting specification                                                                                                                                                   | Final specification (female full version) | Final specification (male full version) |
|------------------------------------------|--------------------------------------------------------------------------------------------------------------------------------------------------------------------------|-------------------------------------------|-----------------------------------------|
| Asthma                                   | Yes / no                                                                                                                                                                 | Unchanged                                 | Unchanged                               |
| Body mass index (BMI), kg/m <sup>2</sup> | Underweight (<18.5)<br>Normal weight (18.5 to 25)<br>Overweight (25 to 30)<br>Obese class 1 (30 to 35)<br>Obese class 2 (35 to 40)<br>Obese class 3 (>40)<br>Unknown BMI | Unchanged                                 | Unchanged                               |
| High blood pressure                      | Yes / no                                                                                                                                                                 | Unchanged                                 | Unchanged                               |
| Household secondhand smoke               | Yes / no                                                                                                                                                                 | Excluded                                  | Excluded                                |
| Self-rated health                        | Poor or fair<br>Good<br>Very good or excellent                                                                                                                           | Unchanged                                 | Unchanged                               |
| Self-rated stress                        | Not at all stressful<br>Not very stressful<br>A bit stressful<br>Quite a bit or extremely stressful                                                                      | Unchanged                                 | Unchanged                               |

All responses are based on individual self-report.

**eTable 3. Fine-Gray Model of Time-to-First Chronic Disease With Death as a Competing Risk Using the Parsimonious Version of CDPoRT, by Sex**

| Variable                              |                          |               | Female        |              |         | Male          |              |         |
|---------------------------------------|--------------------------|---------------|---------------|--------------|---------|---------------|--------------|---------|
|                                       |                          |               | sdHR (95% CI) |              | P-value | sdHR (95% CI) |              | P-value |
| Alcohol consumption                   | Heavy drinker            | Light drinker | 1.29          | (1.00, 1.67) | 0.049   | 0.89          | (0.77, 1.03) | 0.111   |
|                                       | Moderate drinker         |               | 1.10          | (0.97, 1.26) | 0.131   | 0.99          | (0.88, 1.12) | 0.870   |
|                                       | Non-drinker              |               | 1.38          | (1.25, 1.53) | <0.001  | 1.21          | (1.07, 1.35) | 0.002   |
| Cigarette smoking                     | Heavy drinker            | Never smoked  | 1.31          | (0.90, 1.89) | 0.158   | 1.06          | (0.73, 1.53) | 0.762   |
|                                       | Moderate drinker         |               | 1.84          | (1.46, 2.32) | <0.001  | 1.42          | (1.13, 1.78) | 0.002   |
|                                       | Non-drinker              |               | 2.90          | (2.62, 3.21) | <0.001  | 2.30          | (2.05, 2.58) | <0.001  |
|                                       | Former occasional smoker |               | 0.85          | (0.76, 0.96) | 0.007   | 1.01          | (0.86, 1.19) | 0.888   |
|                                       | Former daily smoker      |               | 1.21          | (1.09, 1.35) | <0.001  | 1.18          | (1.05, 1.32) | 0.005   |
| Daily fruit and vegetable consumption | 3 to 6 times             | 0 to 3 times  | 0.93          | (0.85, 1.02) | 0.120   | 0.93          | (0.85, 1.02) | 0.130   |
|                                       | 6+ times                 |               | 0.88          | (0.78, 0.98) | 0.021   | 0.85          | (0.75, 0.97) | 0.016   |
| Age                                   | Age (spline term 1)      |               | 1.13          | (1.11, 1.16) | <0.001  | 1.21          | (1.16, 1.26) | <0.001  |
|                                       | Age (spline term 2)      |               | 0.79          | (0.74, 0.85) | <0.001  | 0.66          | (0.53, 0.82) | <0.001  |
|                                       | Age (spline term 3)      |               | 1.61          | (1.38, 1.88) | <0.001  | 2.57          | (1.28, 5.15) | 0.008   |
|                                       | Age (spline term 4)      |               | --            | --           | --      | 0.59          | (0.30, 1.18) | 0.134   |
| Visible minority                      |                          |               | 1.41          | (1.25, 1.61) | <0.001  | 1.35          | (1.19, 1.52) | <0.001  |
| Asthma                                |                          |               | 1.46          | (1.30, 1.65) | <0.001  | 1.32          | (1.12, 1.56) | 0.001   |
| BMI                                   | Underweight              | Normal weight | 0.82          | (0.55, 1.24) | 0.350   | 1.53          | (0.97, 2.43) | 0.070   |
|                                       | Overweight               |               | 1.46          | (1.32, 1.62) | <0.001  | 1.16          | (1.04, 1.30) | 0.007   |
|                                       | Obese class 1            |               | 1.87          | (1.67, 2.10) | <0.001  | 1.78          | (1.56, 2.02) | <0.001  |
|                                       | Obese class 2            |               | 2.85          | (2.38, 3.41) | <0.001  | 2.70          | (2.26, 3.22) | <0.001  |
|                                       | Obese class 3            |               | 3.24          | (2.66, 3.93) | <0.001  | 3.33          | (2.63, 4.22) | <0.001  |
|                                       | Unknown BMI              |               | 1.55          | (1.36, 1.77) | <0.001  | 1.42          | (1.18, 1.70) | <0.001  |
| High blood pressure                   |                          |               | 1.40          | (1.27, 1.54) | <0.001  | 1.44          | (1.30, 1.58) | <0.001  |
| Self-rated health                     | Poor/fair                | Good          | 1.23          | (1.09, 1.38) | 0.001   | 1.10          | (0.97, 1.25) | 0.130   |
|                                       | Very good / excellent    |               | 0.83          | (0.76, 0.90) | <0.001  | 0.75          | (0.68, 0.82) | <0.001  |

## eReferences

1. Nagelkerke NJD. A note on a general definition of the coefficient of determination. *Biometrika*. 1991;78(3):691-692. doi:10.1093/biomet/78.3.691
2. Austin PC, Pencina MJ, Steyerberg EW. Predictive accuracy of novel risk factors and markers: A simulation study of the sensitivity of different performance measures for the Cox proportional hazards regression model. *Stat Methods Med Res*. 2017;26(3):1053-1077. doi:10.1177/0962280214567141
3. Brier GW. Verification of forecasts expressed in terms of probability. *Mon Weather Rev*. 1950;78(1):1-3. doi:10.1126/science.27.693.594
4. Steyerberg EW, Vickers AJ, Cook NR, et al. Assessing the performance of prediction models: a framework for traditional and novel measures. *Epidemiology*. 2010;21(1):128-138. doi:10.1097/EDE.0b013e3181c30fb2
5. Rahman MS, Ambler G, Choodari-Oskooei B, Omar RZ. Review and evaluation of performance measures for survival prediction models in external validation settings. *BMC Med Res Methodol*. 2017;17(1):1-15. doi:10.1186/s12874-017-0336-2
6. Yates JF. External correspondence: Decompositions of the mean probability score. *Organ Behav Hum Perform*. 1982;30(1):132-156. doi:10.1016/0030-5073(82)90237-9
7. Moons KGM, Altman DG, Reitsma JB, et al. Transparent Reporting of a multivariable prediction model for Individual Prognosis Or Diagnosis (TRIPOD): Explanation and Elaboration. *Ann Intern Med*. 2015;162(1):W1-W73. doi:10.7326/M14-0698
8. Van Calster B, Nieboer D, Vergouwe Y, De Cock B, Pencina MJ, Steyerberg EW. A calibration hierarchy for risk models was defined: From utopia to empirical data. *J Clin Epidemiol*. 2016;74:167-176. doi:10.1016/j.jclinepi.2015.12.005
9. Steyerberg EW, Vergouwe Y. Towards better clinical prediction models: Seven steps for development and an ABCD for validation. *Eur Heart J*. 2014;35(29):1925-1931. doi:10.1093/eurheartj/ehu207
10. Liang CJ, Heagerty PJ. A risk-based measure of time-varying prognostic discrimination for survival models. *Biometrics*. 2017;73(3):725-734. doi:10.1111/biom.12628
